# Supplementary material for: An iron-containing ferritin-based nanosensitizer for synergistic ferroptosis/sono-photodynamic cancer therapy
Source: Royal Society of Chemistry journal article supplement (doi:10.1039/d3tb00029j), 2023-01-01
Supplement: d3tb00029j1.pdf [file d3tb00029j1.pdf]

## Supplementary information

for

### Iron-containing ferritin-based nanosensitizer for synergistic ferroptosis/sonophotodynamic cancer therapy

Yilin Zheng<sup>a1</sup>, Jianping Zheng<sup>b1</sup>, Manyi Du<sup>a</sup>, Ya Yang<sup>a</sup>, Xudong Li<sup>a</sup>, Haijun Chen<sup>c,\*</sup>,  
Yu Gao<sup>a,\*</sup>

<sup>a</sup>Cancer Metastasis Alert and Prevention Center, and Fujian Provincial Key Laboratory of Cancer Metastasis Chemoprevention and Chemotherapy, College of Chemistry, Fuzhou University, Fuzhou, Fujian 350108, China

<sup>b</sup>Department of Oncology, Shengli Clinical Medical College of Fujian Medical University & Fujian Provincial Hospital, Fuzhou, Fujian 350001, China

<sup>c</sup>Key Laboratory of Molecule Synthesis and Function Discovery (Fujian Province University), College of Chemistry, Fuzhou University, Fuzhou, Fujian 350108, China

<sup>1</sup>Y. Zheng and J. Zheng contributed equally to this work.

\*Corresponding authors. Phone and Fax: +86-0591-2286-7183.

Email addresses: [ygao@fzu.edu.cn](mailto:ygao@fzu.edu.cn) (Yu Gao), or [chenhaij@gmail.com](mailto:chenhaij@gmail.com) (Haijun Chen).

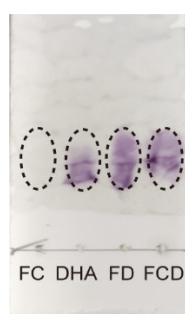

Fig. S1. Thin layer chromatography (TLC) of FC, DHA, FD and FCD. FC, FD and FCD were first concentrated with an ultrafiltration tube to increase the concentration of DHA and diluted with chloroform. The FC, FD, FCD and DHA reference solution were spotted on the same thin-layer plate respectively, developed with a developing system of 1,2-dichloroethane:ethyl ether solution (80:20, v/v), and sprayed with 5% vanillin sulfate ethanol solution immediately after drying. Finally, the thin-layer plate was put in a 75 °C oven for about 10 min until the spots became clear.

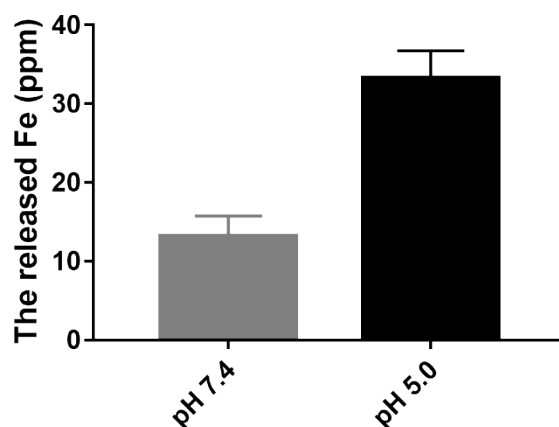

Fig. S2. Acidic condition-triggered release of iron ions from FCD measured by ICP-MS.

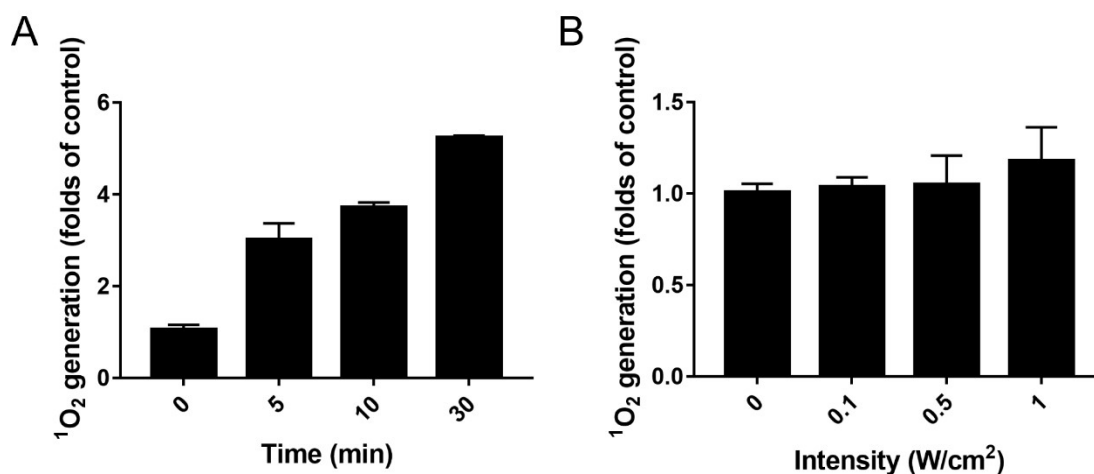

Fig. S3. (A) The <sup>1</sup>O<sub>2</sub> generated by FCD under laser with different light exposure time evaluated by SOSG. (B) The <sup>1</sup>O<sub>2</sub> generated by FCD under ultrasound with different ultrasonic intensities.

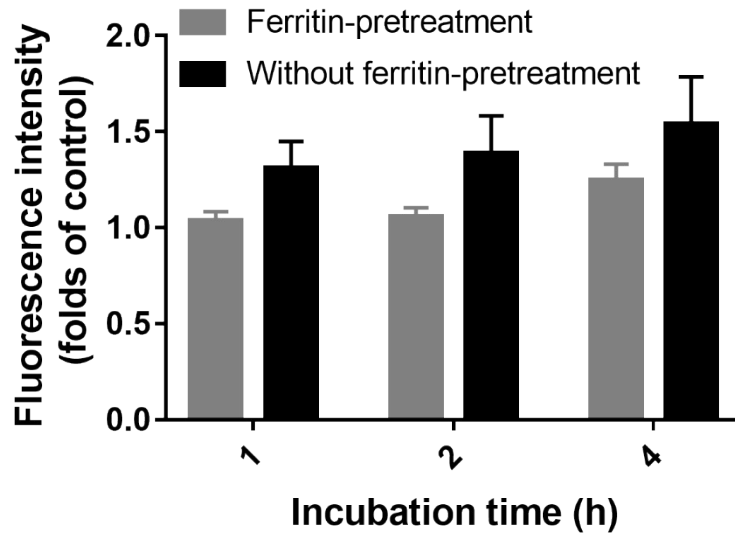

Fig. S4. The effect of ferritin pre-treatment on cellular uptake of FCD by MCF-7 cells.

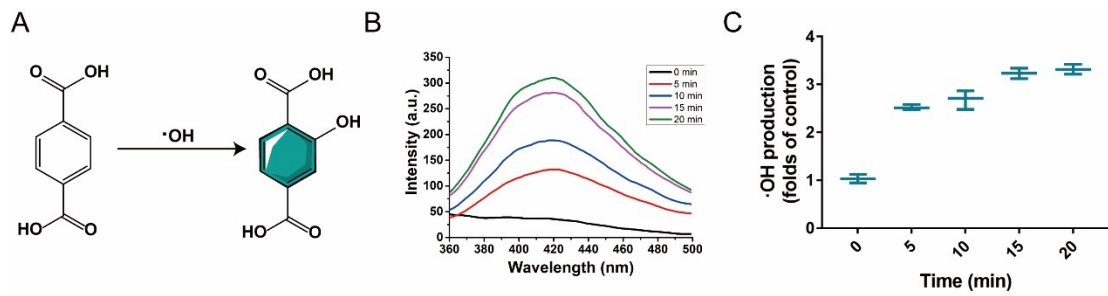

Fig. S5. (A) Oxidation of terephthalic acid (TA) to 2-hydroxy-terephthalic acid (TAOH) by  $\cdot\text{OH}$ . (B) Fluorescence spectra of TA-OH for detection of  $\cdot\text{OH}$  generated by ferritin. (C) Detection of  $\cdot\text{OH}$  generated by ferritin.

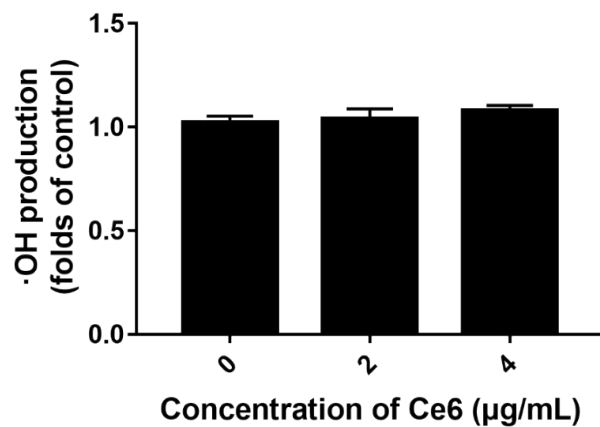

Fig. S6. Detection of  $\cdot\text{OH}$  generated by Ce6 in MCF-7 cells.

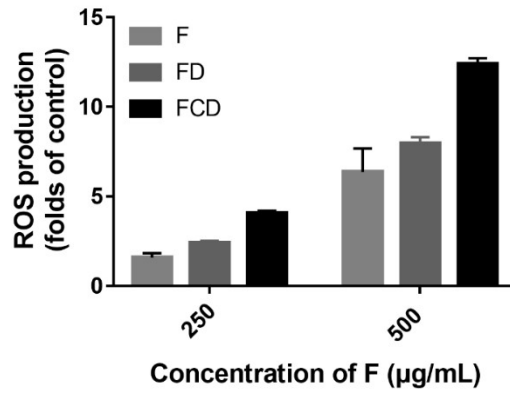

Fig. S7. ROS generation evaluated by the measurement of DCFH-DA fluorescent probe.

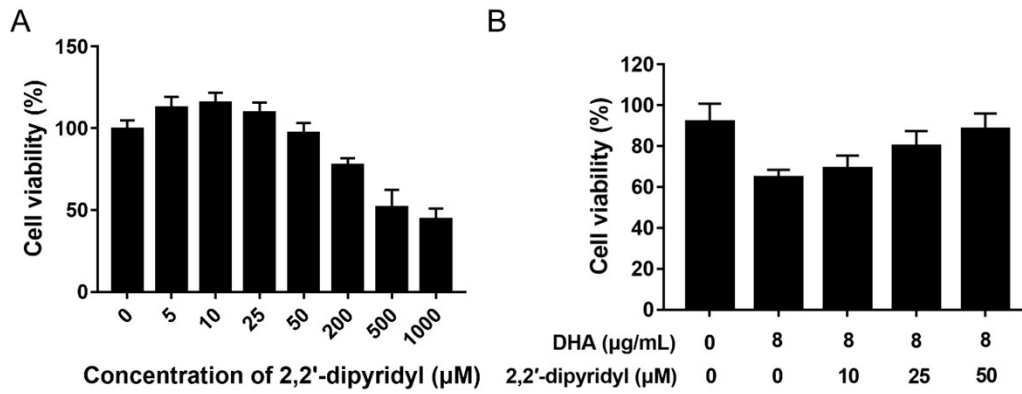

Fig. S8. (A) Cell viability of MCF-7 cells treated with different concentrations of 2,2'-dipyridyl. (B) Cell viability of MCF-7 cells treated with DHA under different concentrations of 2,2'-dipyridyl.

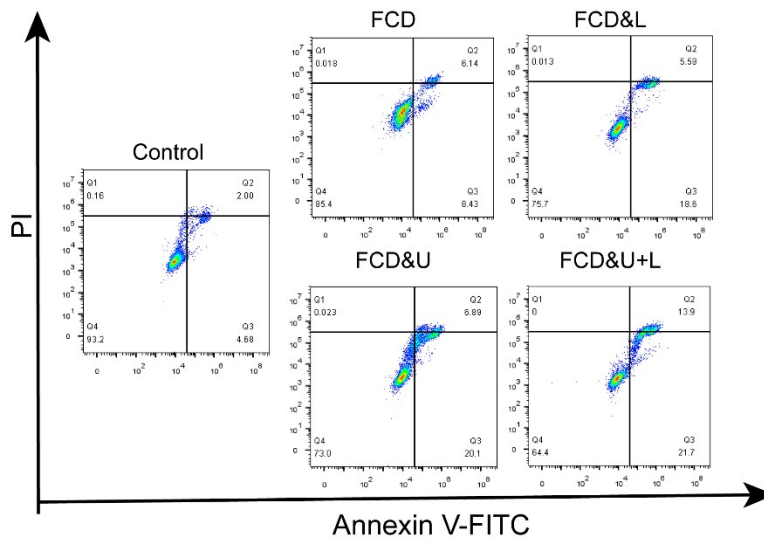

Fig. S9. Cell apoptosis analysis of MCF-7 cells treated with FCD under different irradiations.
